# Supplementary material
Source: publisher figshare collection journal article supplement (https://acs.figshare.com/ndownloader/files/3924526)
Supplement: Supplementary file 1 [file 3924526]

# Novel Acyl Derivatives from Karanja Oil: Alternative Renewable Lubricant Basestocks

Geethanjali, Gorla Sony M. Kour, Korlipara V. Padmaja, Mallampalli S. L Karuna,  
Rachapudi B. N. Prasad\*

Centre for Lipid Research, Indian Institute of Chemical Technology, Hyderabad, 500-007, India

## Keywords

Karanja oil, formic acid, epoxidation, hydroxylation, acylation, lubricant base stocks.

**ABSTRACT:** Lubricant base stocks of acylated oil and its derivatives namely propionylated, butanoylated, hexanoylated karanja oil and fatty acid methyl esters were synthesized from renewable non edible source karanja oil (*Pongamia glabra*). The reaction was carried out by Prilezhaev dihydroxylation using *in situ* generated peroxyformic acid from hydrogen peroxide and formic acid. The hydroxylated derivatives were acylated using different anhydrides (C<sub>3</sub>, C<sub>4</sub> and C<sub>6</sub>). All the synthesized Products were characterized by GC, GC-MS, IR, <sup>1</sup>H NMR spectral studies. The synthesized acylated derivatives were evaluated for physico-chemical and lubricant properties. Propionylated and butanoylated esters of KFAME were found suitable for IS: 3098 hydraulic fluids in ISO VG 46 and ISO VG 68 category respectively. Propionylated ester of KFAME was found suitable for IS: 8406 gear oils (R & O type). Other lubrication properties like viscosity, viscosity index of all the products belong to group III, category of base fluids as per API classification, Cu corrosion value, air release value were found to be good. These base stocks may find applications in hydraulic fluids and metal working fluids.

**Table 1. Fatty Acid Composition of Acylated Karanja Fatty Acid Methyl Esters.**

| <b>Fatty Acid</b>         | <b>BuEHKFAME</b> | <b>PrEHKFAME</b> | <b>HxEHKFAME</b> |
|---------------------------|------------------|------------------|------------------|
| C <sub>16:0</sub>         | 1.5              | 1.2              | 1.8              |
| C <sub>18:0</sub>         | 2.4              | 1.8              | 2.6              |
| C <sub>18:1</sub>         | NIL              | NIL              | NIL              |
| C <sub>18:2</sub>         | NIL              | NIL              | NIL              |
| C <sub>20:0</sub>         | 1.3              | 1.2              | 1.2              |
| C <sub>20:1</sub>         | Nil              | 6.5              | Nil              |
| C <sub>22:0</sub>         | 6.3              | 6.5              | 5.8              |
| C <sub>24:0</sub>         | 2.8              | 1.1              | 2.3              |
| C <sub>18:1</sub> Acyloxy | 38.4             | 39.8             | 43.4             |
| C <sub>18:2</sub> Acyloxy | 25.1             | 15.5             | 23.3             |
| C <sub>20:1</sub> Acyloxy | 1.9              | nil              | 1.4              |
| others                    | 19.8             | 16.2             | 16.7             |

**Table 2. Lubricating Properties of Acylated Products of Karanja oil**

| Property                   | PrEHKO  | BuEHKO  | HxEHKO  |
|----------------------------|---------|---------|---------|
| Density 30°C               | ND      | ND      | ND      |
| Viscosity, cSt 40 °C       | ND      | ND      | ND      |
| 100 °C                     | 63.7    | 55.6    | 36.5    |
| Viscosity Index            | ND      | ND      | ND      |
| Pour Point (°C)            | 12      | 9       | 9       |
| Copper strip corrosion     | 1a      | 1a      | 1a      |
| Flash point (°C)           | 228     | 275     | 288     |
| Noack evaporation loss (%) | 4.2     | 3.2     | 3.1     |
| RBOT(min)                  | 10      | 10      | 12      |
| Air release value (min)    | 43.7    | 42.8    | 26.9    |
| Weld load (kg)             | 210     | 210     | 200     |
| Hydrolytic Stability       |         |         |         |
| Cu strip weight loss       | 0.0012  | 0.0017  | 0.0009  |
| Cu strip appearance        | 1a      | 3b      | 1b      |
| Water acidity              | 5.16    | 6.25    | 12.6    |
| Foam stability (mL)        | Nil/Nil | Nil/Nil | 10/Nil  |
| Sequence1 24°C             | Nil/Nil | 20/Nil  | 20/Nil  |
| Sequence2 93.5°C           | Nil/Nil | Nil/Nil | Nil/Nil |
| Sequence3 24°C             |         |         |         |

**Table 3. Lubricating Properties of Acylated Products of Karanja Fatty Acid Methyl Esters.**

| <b>Property</b>            |        | <b>PrEHKFAME</b> | <b>BuEHKFAME</b> | <b>HxEHKFAME</b> |
|----------------------------|--------|------------------|------------------|------------------|
| Density 30°C               |        | 0.97306          | 0.97236          | 0.96424          |
| Viscosity, cSt             | 40 °C  | 25.2             | 25.8             | 25.8             |
|                            | 100 °C | 4.8              | 4.9              | 5.1              |
| Viscosity Index            |        | 111              | 114              | 128              |
| Pour Point (°C)            |        | +15              | +15              | +15              |
| Copper strip corrosion     |        | 1a               | 1a               | 1a               |
| Flash point (°C)           |        | 234              | 244              | 222              |
| Noack evaporation loss (%) |        | 23.4             | 16.6             | 13.8             |
| RBOT(min)                  |        | 5                | 10               | 10               |
| Air release value (min)    |        | 8.15             | 8.58             | 8.87             |
| Weld load (kg)             |        | 180              | 170              | 170              |
| Emulsion characteristics   |        | 40-40-0 (10 min) | 43-37-0 (90 min) | 43-37-0 (90 min) |
| Hydrolytic Stability       |        |                  |                  |                  |
| Cu strip weight loss       |        | 0.0011           | 0.008            | 0.0008           |
| Cu strip appearance        |        | 1b               | 1b               | 1b               |
| Water acidity              |        | 11.5             | 8.9              | 8.4              |
| Foam stability (mL)        |        |                  |                  |                  |
| Sequence1 24°C             |        | Nil /Nil         | Nil /Nil         | Nil /Nil         |
| Sequence2 93.5°C           |        | Nil /Nil         | Nil /Nil         | Nil /Nil         |
| Sequence3 24°C             |        | Nil/Nil          | Nil/Nil          | Nil/Nil          |

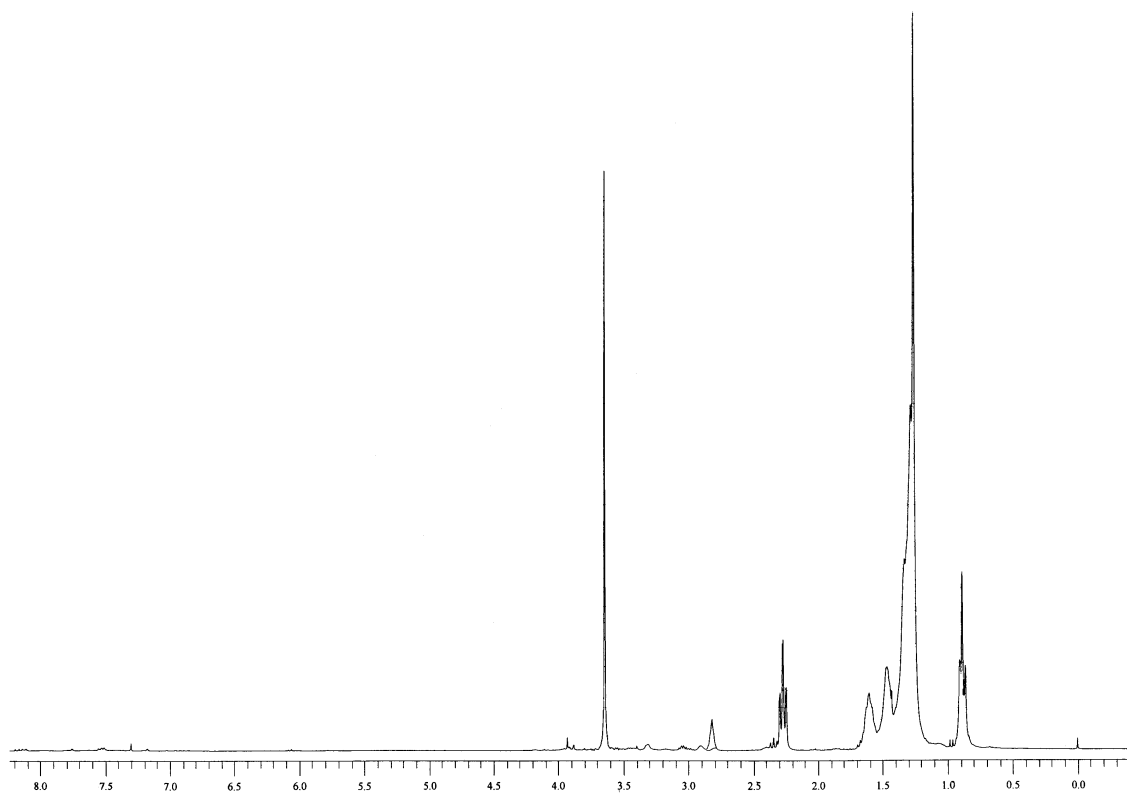

**Fig S1: <sup>1</sup>H NMR Spectrum of Epoxy KFAME.**

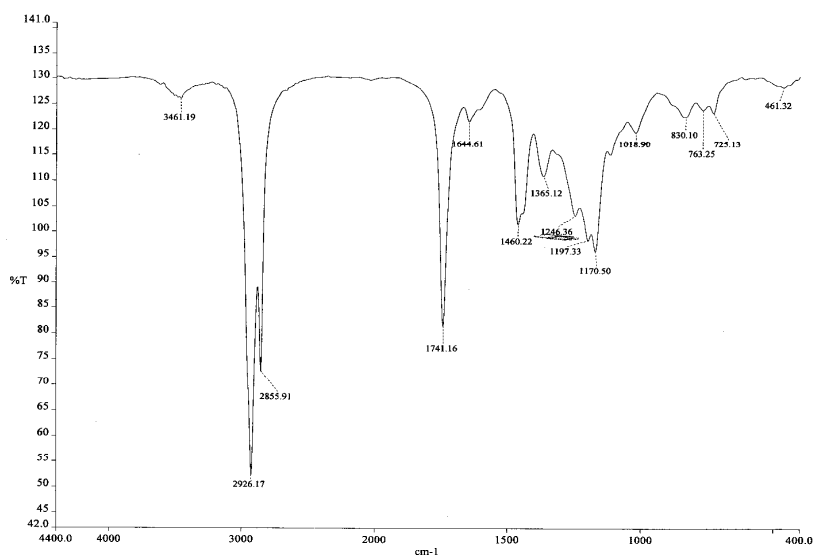

**Fig S2: IR Spectrum of Epoxy KFAME**

## HYDROXYLATED KARANJA OIL

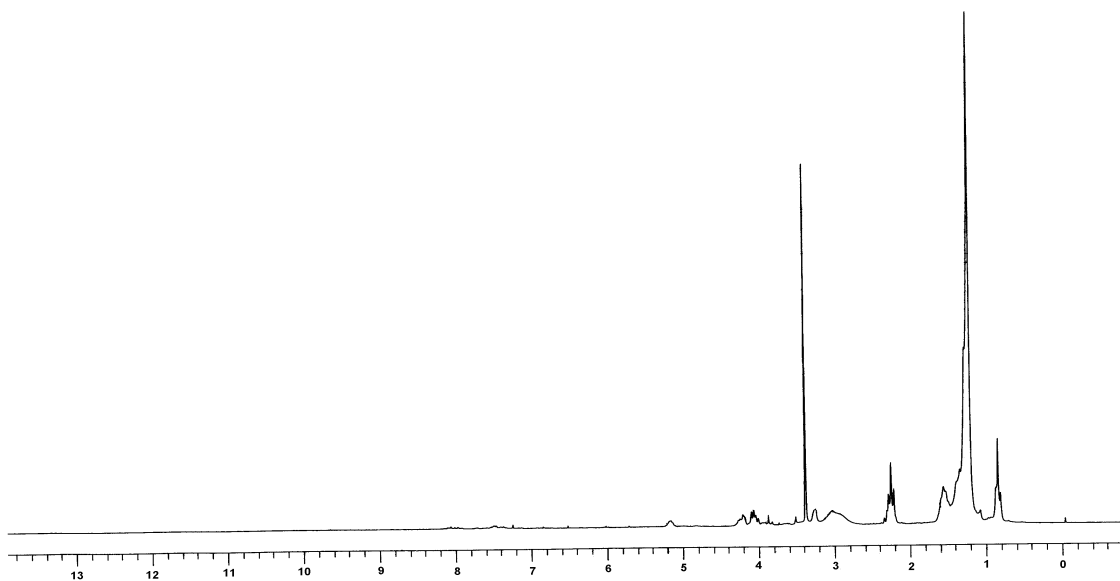

**Fig.S3: <sup>1</sup>H NMR Spectrum of Hydroxylated Karanja Oil**

**IR (neat, cm<sup>-1</sup>): 3445 (-OH), 2925 (C-H), 1743 (C=O), 1102 (C-C(=O)-**

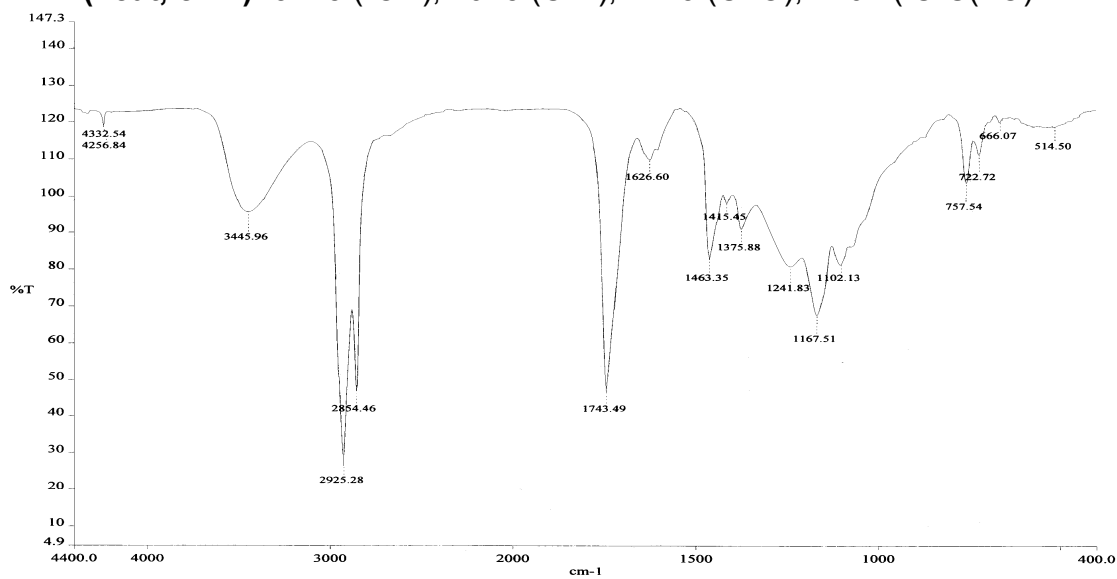

**Fig.S4: IR Spectrum of Hydroxylated Karanja Oil**

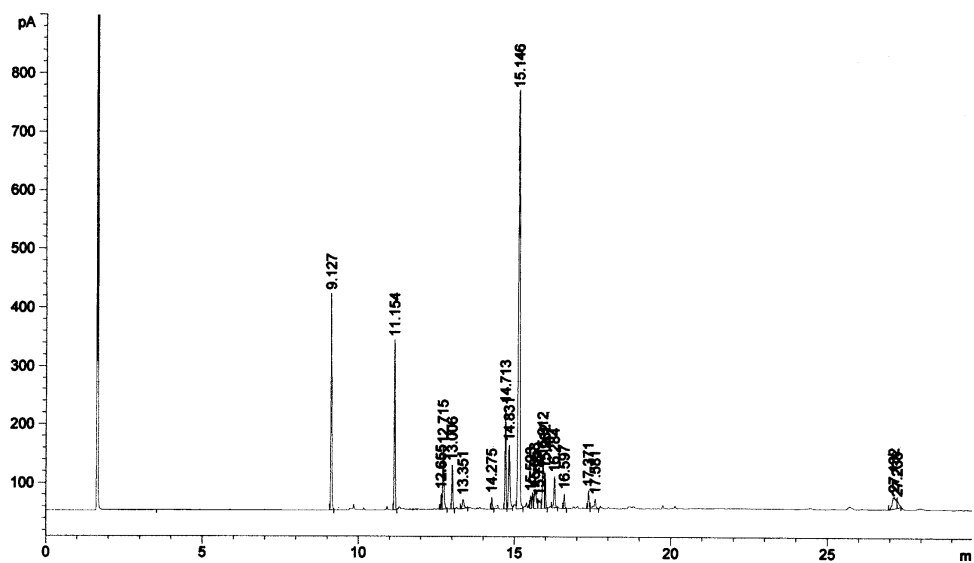

**Fig.S5: GC Spectrum of Hydroxylated Karanja Oil**

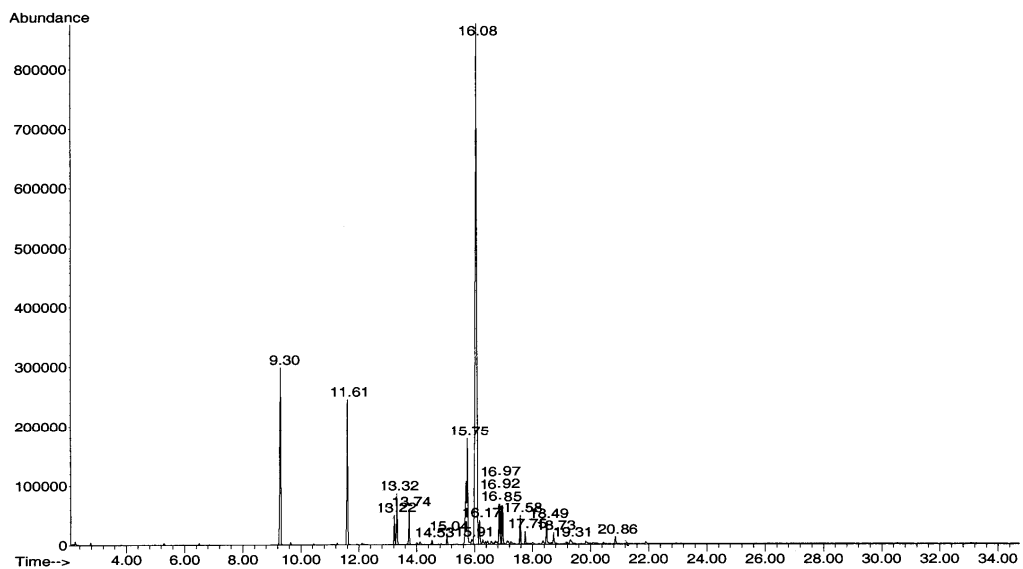

**Fig.S6: GC-MS Spectrum of Hydroxylated Karanja Oil**

## PROPYLOXY ESTER OF HYDROXYLATED KARANJA OIL

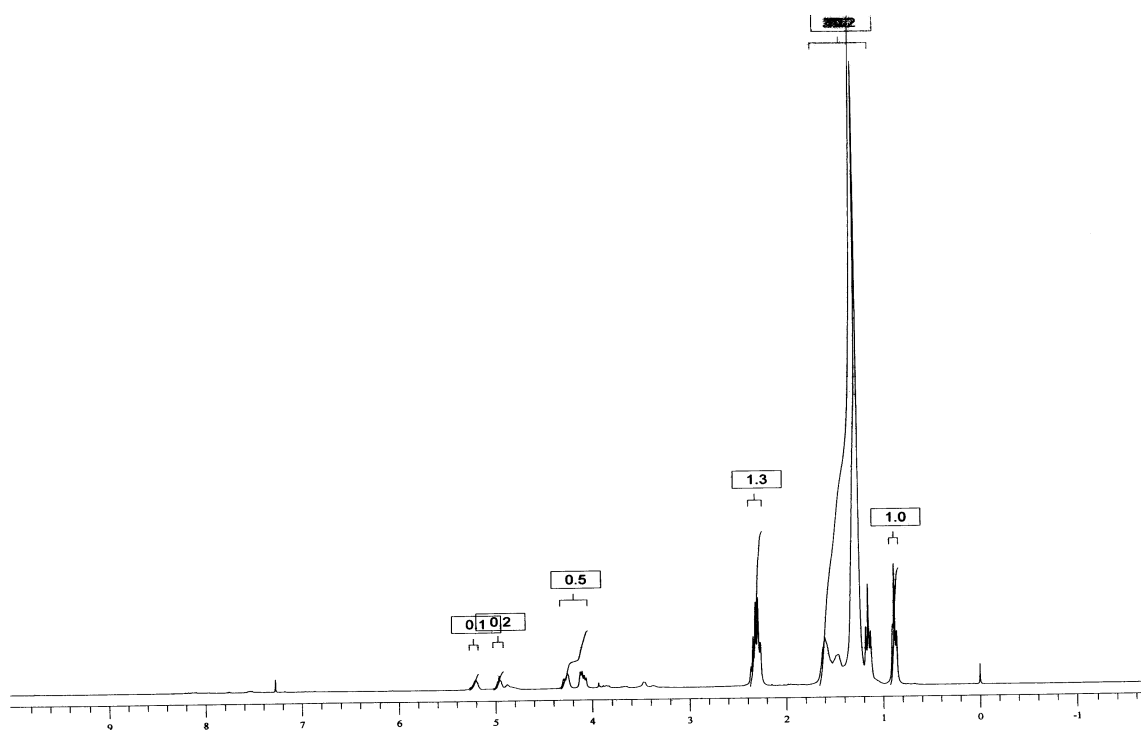

Fig.S7.  $^1\text{H}$  NMR Spectrum of Propyloxy Ester of Hydroxylated Karanja Oil



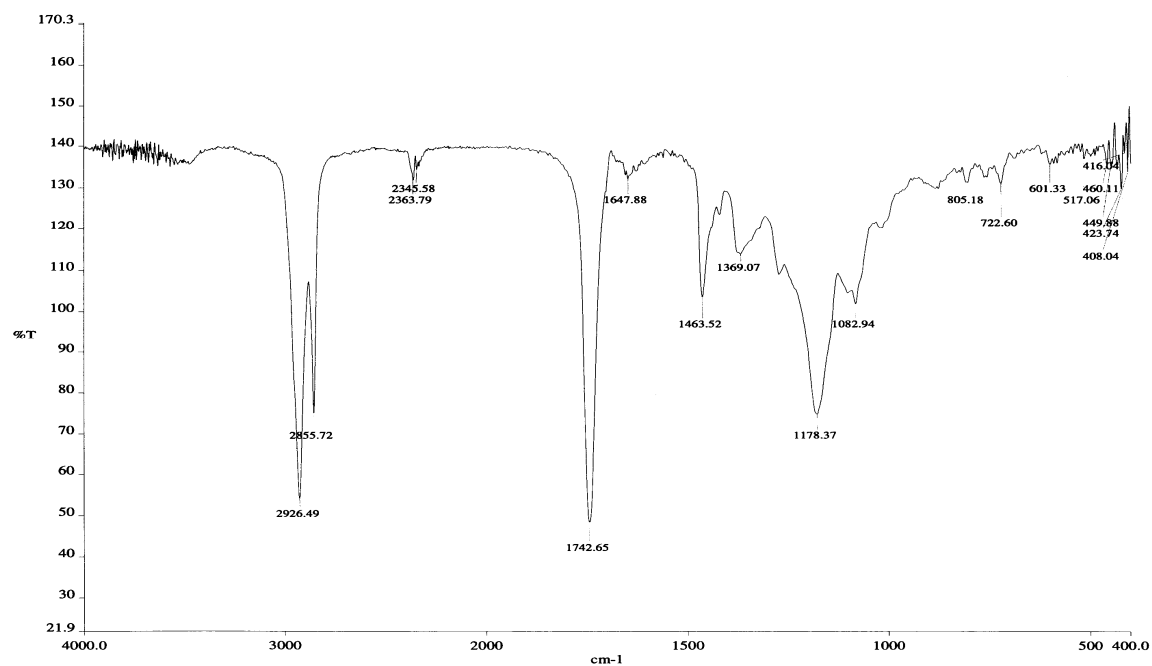

**Fig.S8. IR Spectrum of Propyloxy Ester of Hydroxylated Karanja Oil**

## **HYDROXYLATED KARANJA FATTY ACID METHYL ESTERS**

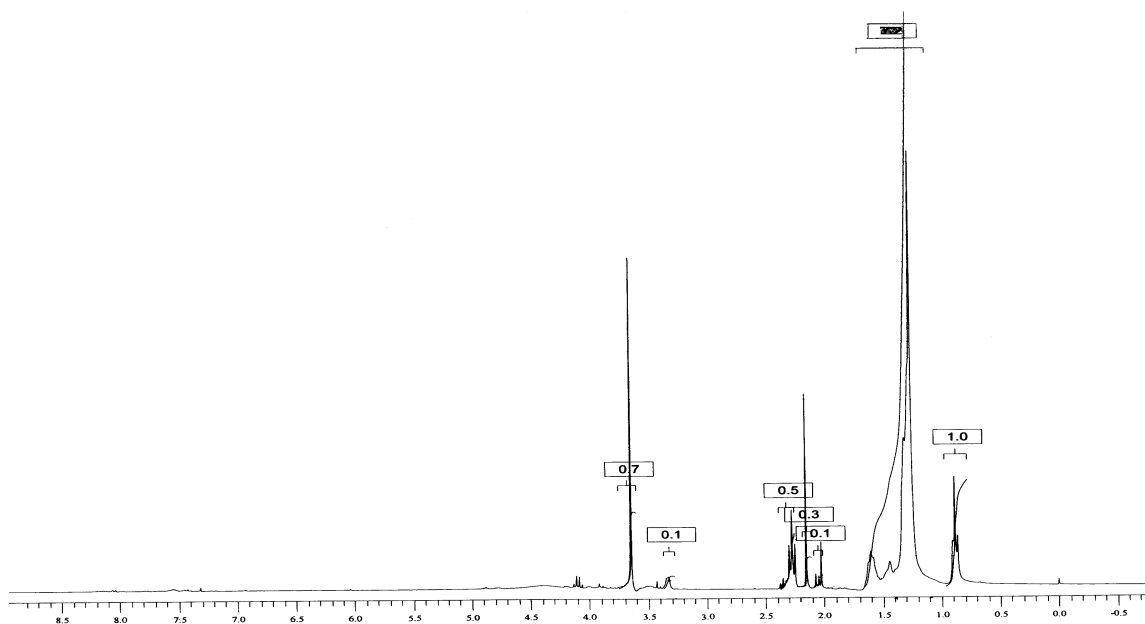

**Fig.S9.  $^1\text{H}$  NMR Spectrum of Hydroxylated Karanja Fatty Acid Methyl Esters**

IR (neat,  $\text{cm}^{-1}$ ): 3445 (-OH), 2925 (C-H), 1743 (C=O), 1102 (C-C(=O)-O).

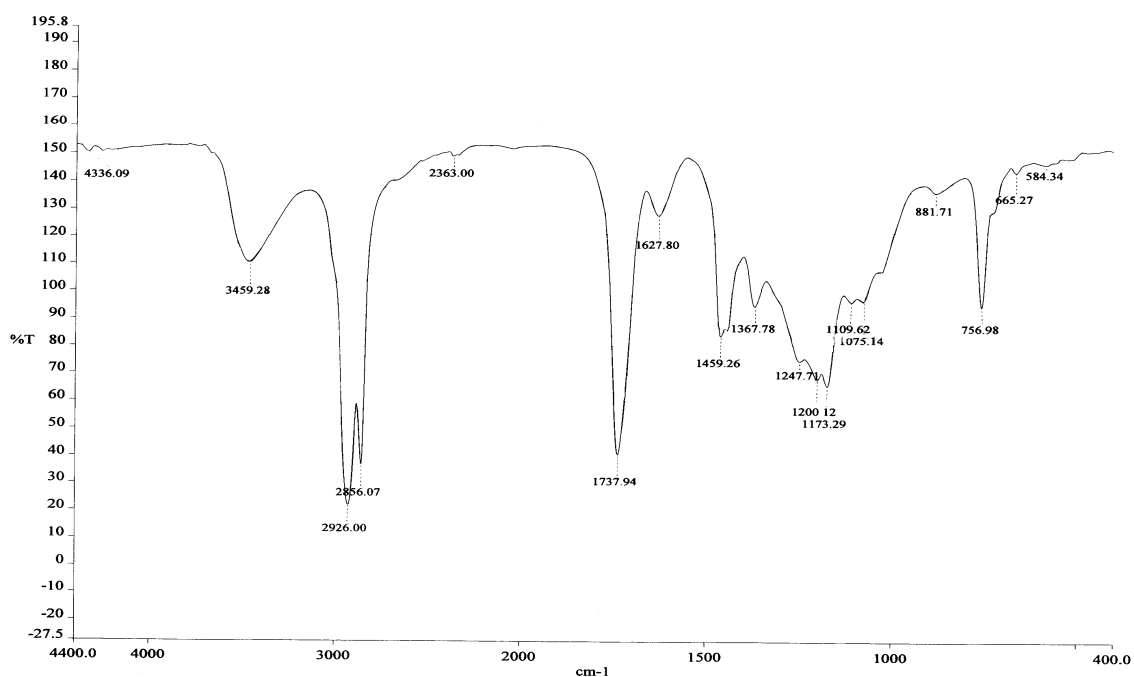

**Fig.S10. IR Spectrum of Hydroxylated Karanja Fatty Acid Methyl Esters**

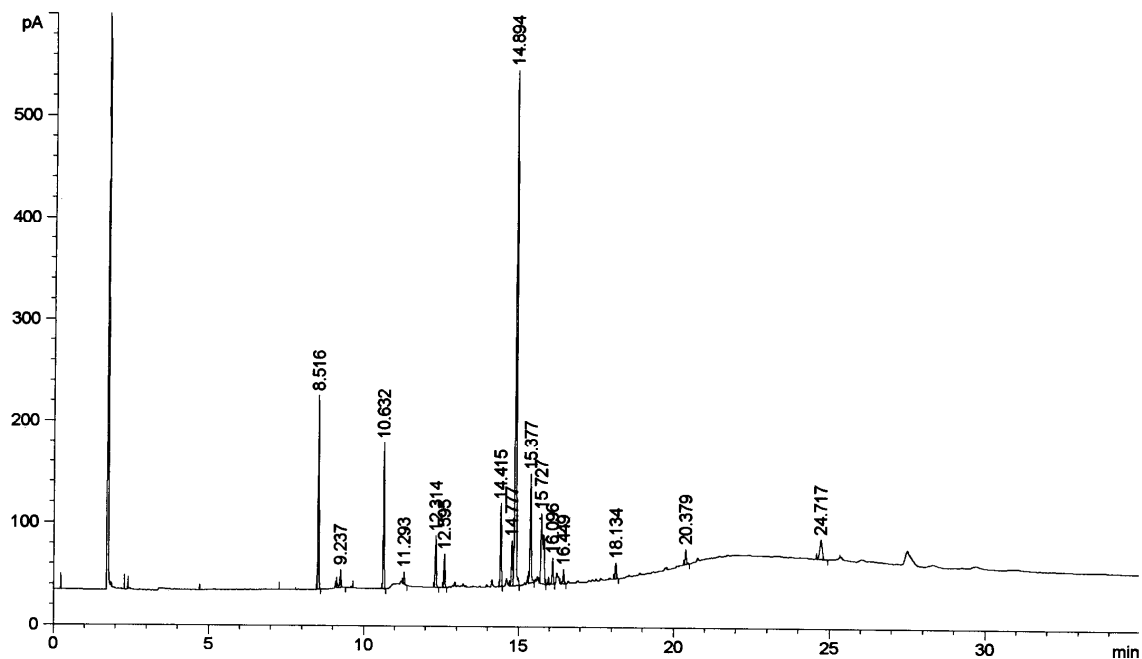

**Fig.S11. GC Spectrum of Hydroxylated Karanja Fatty Acid Methyl Esters**

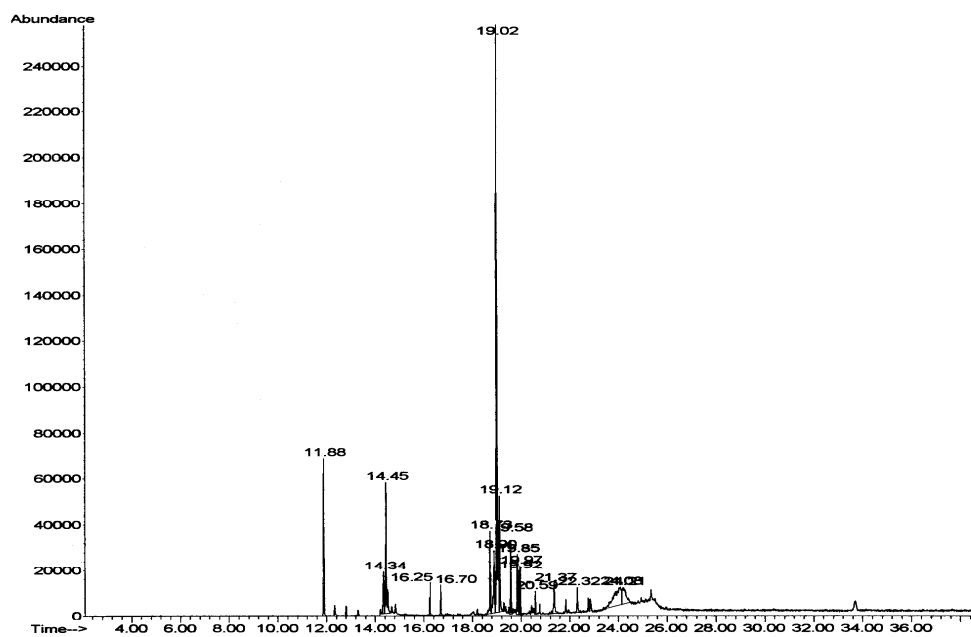

**Fig.S12. GC-MS Spectrum of Hydroxylated Karanja Fatty Acid Methyl Esters**

**PROPYLOXY ESTER OF HYDROXYLATED KARANJA FATTY ACID  
METHYL ESTERS**

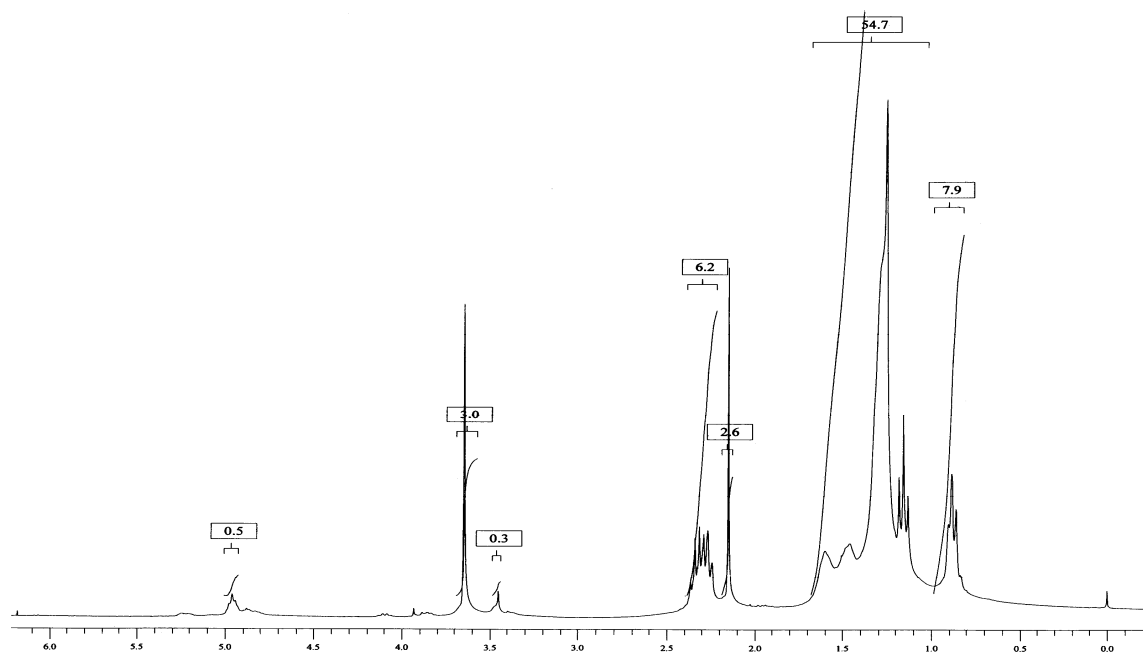

**Fig.S13.  $^1\text{H}$  NMR Spectrum of Propyloxy Ester of Hydroxylated Karanja Fatty Acid Methyl Esters**

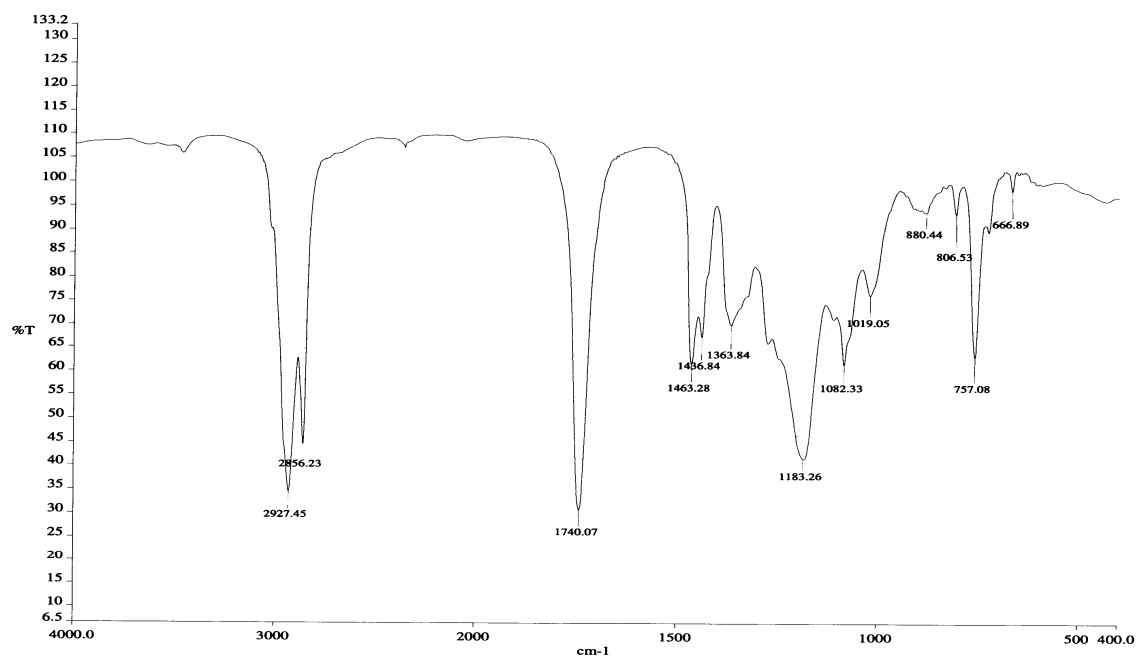

**Fig.S14. IR Spectrum of Propyloxy Ester of Hydroxylated Karanja Fatty Acid Methyl Esters**

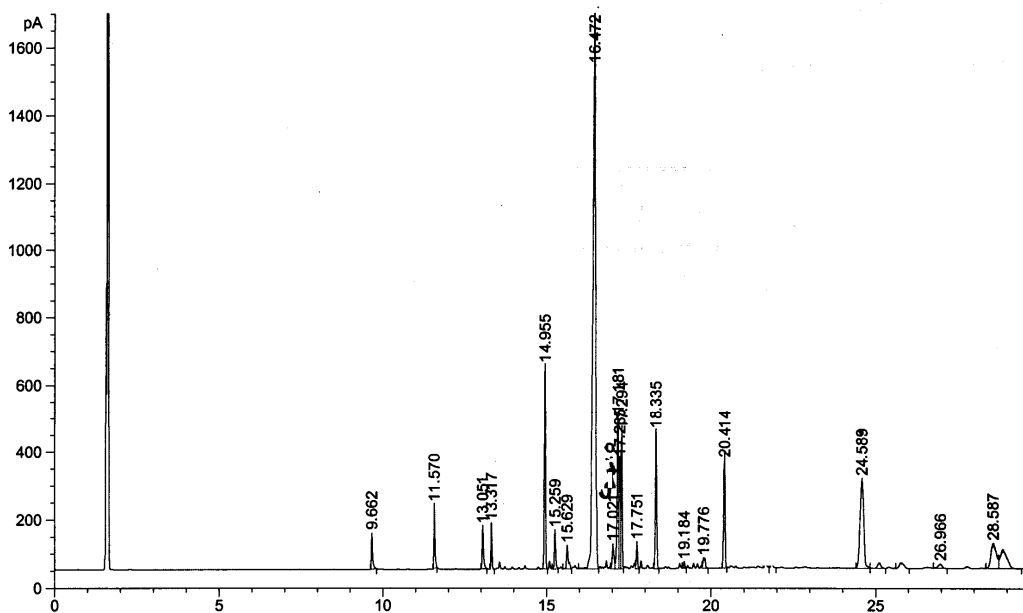

**Fig.S15. GC Spectrum of Propyloxy Ester Of Hydroxylated Karanja Fatty Acid Methyl Esters**

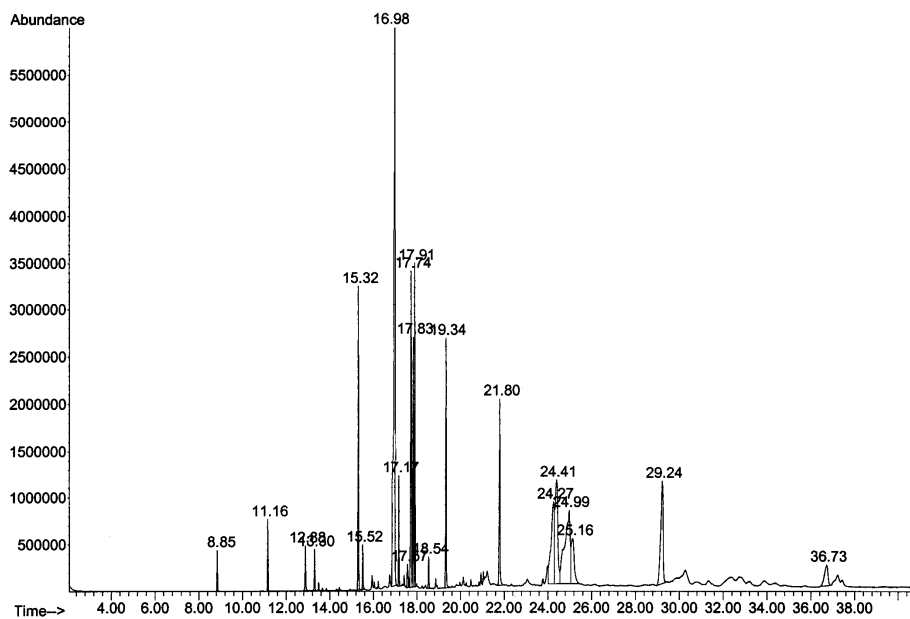

**Fig.S16. GC-MS Spectrum of Propyloxy Ester of Hydroxylated Karanja Fatty Acid Methyl Esters**

**HEXYLOXY ESTER OF HYDROXYLATED KARANJA FATTY ACID  
METHYL ESTERS:**

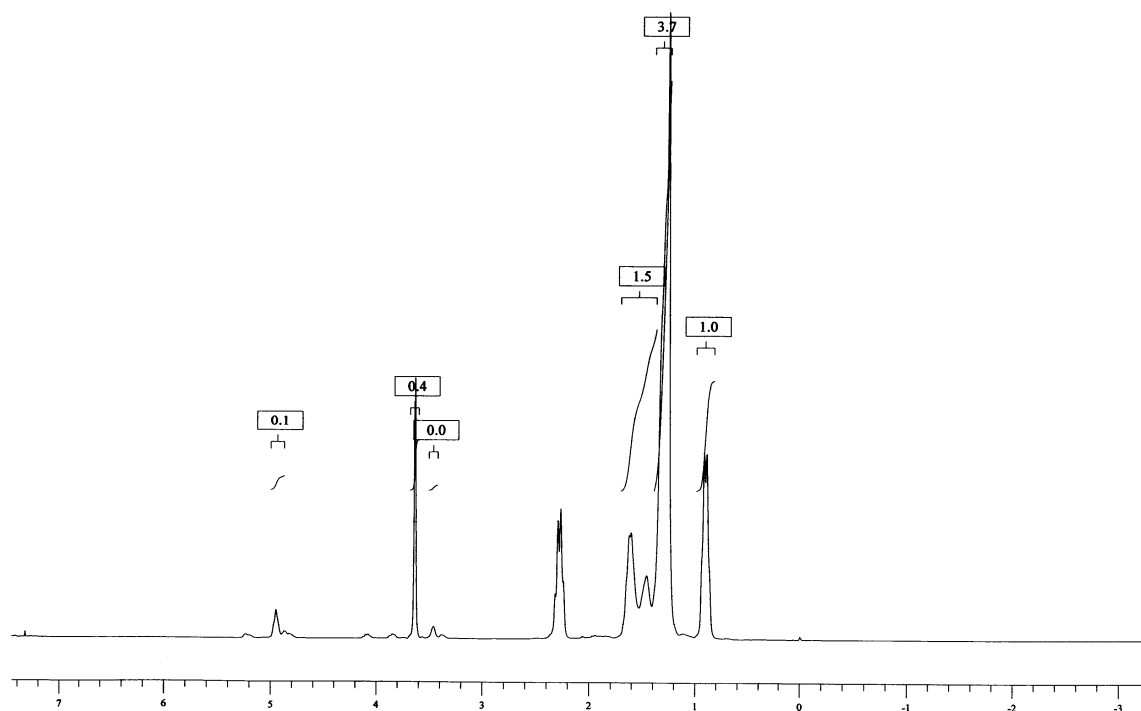

**Fig.S17.  $^1\text{H}$  NMR spectrum of Hexyloxy Ester of Hydroxylated Karanja Fatty Acid Methyl Esters**

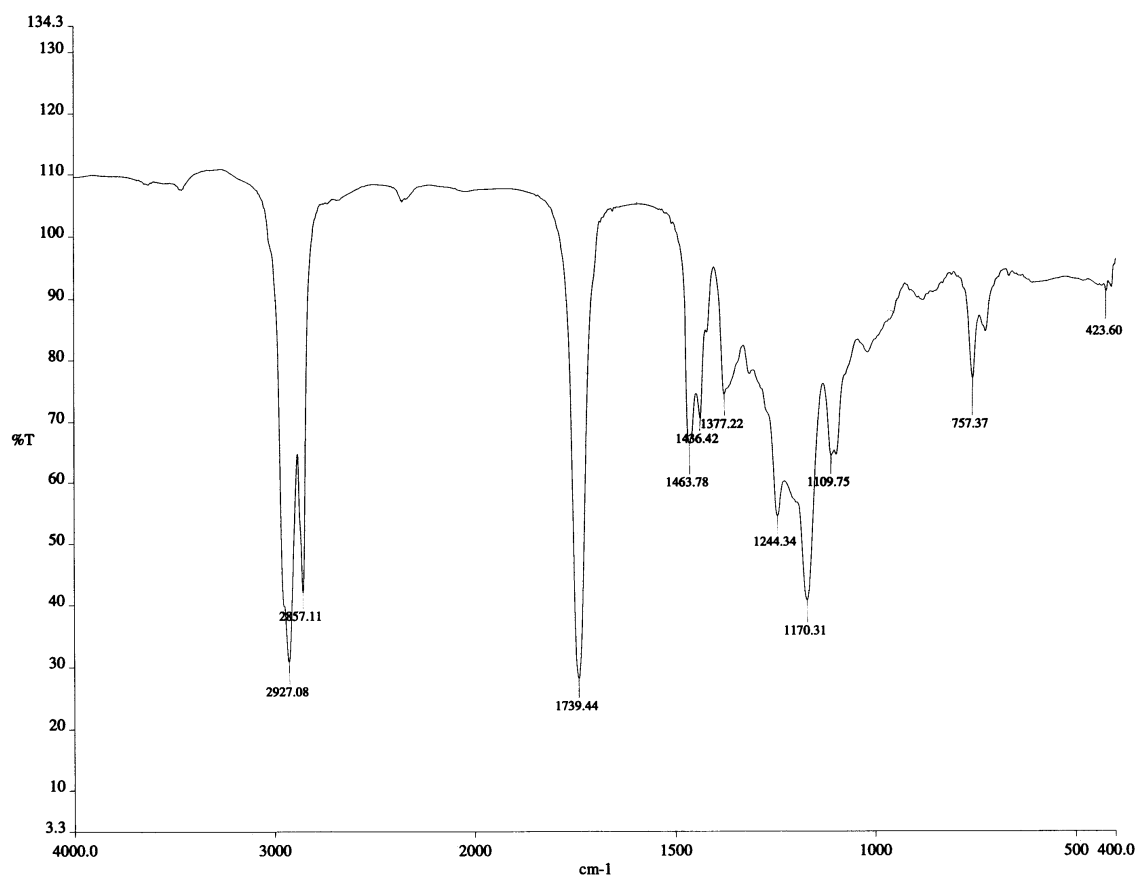

**Fig.S18. IR spectrum of Hexyloxy Ester of Hydroxylated Karanja fatty acid Methyl Esters:**



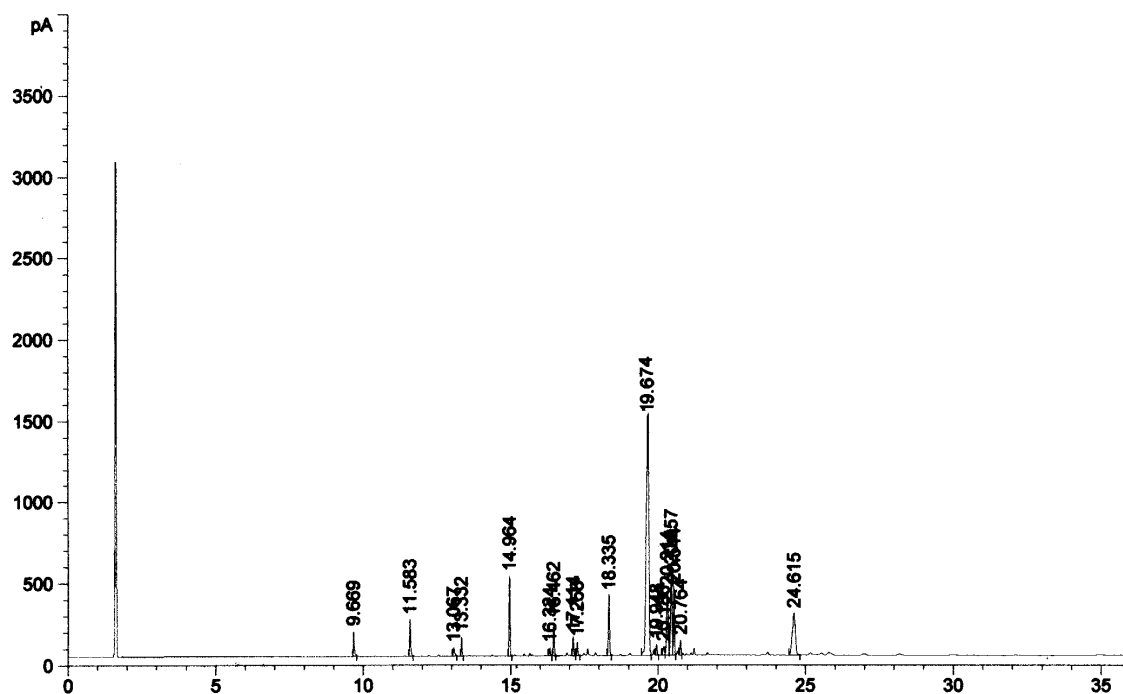

**Fig.S19. GCMS Spectrum of Hexyloxy Ester of Hydroxylated Karanja Fatty Acid Methyl Esters**

**BUTYLOXY ESTER OF HYDROXYLATED KARANJA FATTY ACID  
METHYL ESTERS**

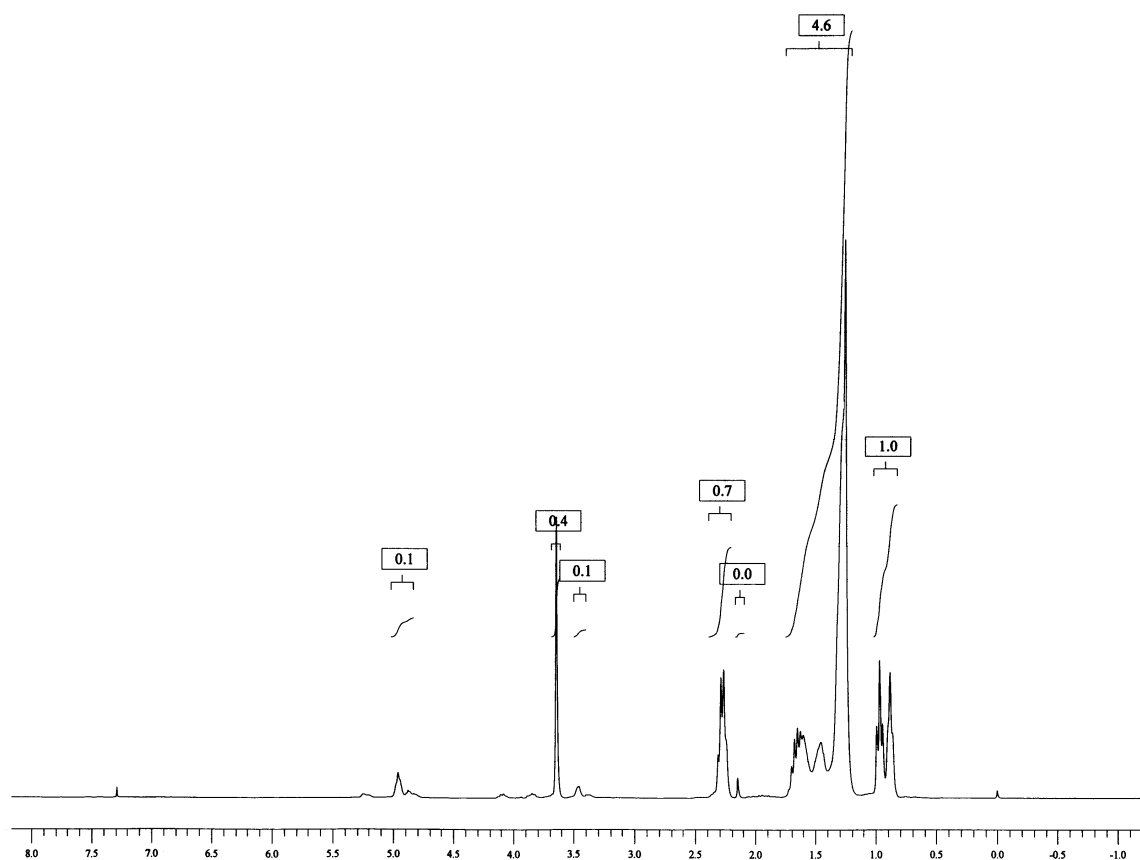

**Fig.S20.  $^1\text{H}$  NMR spectrum of Butyloxy Ester of Hydroxylated Karanja Fatty Acid Methyl Esters**

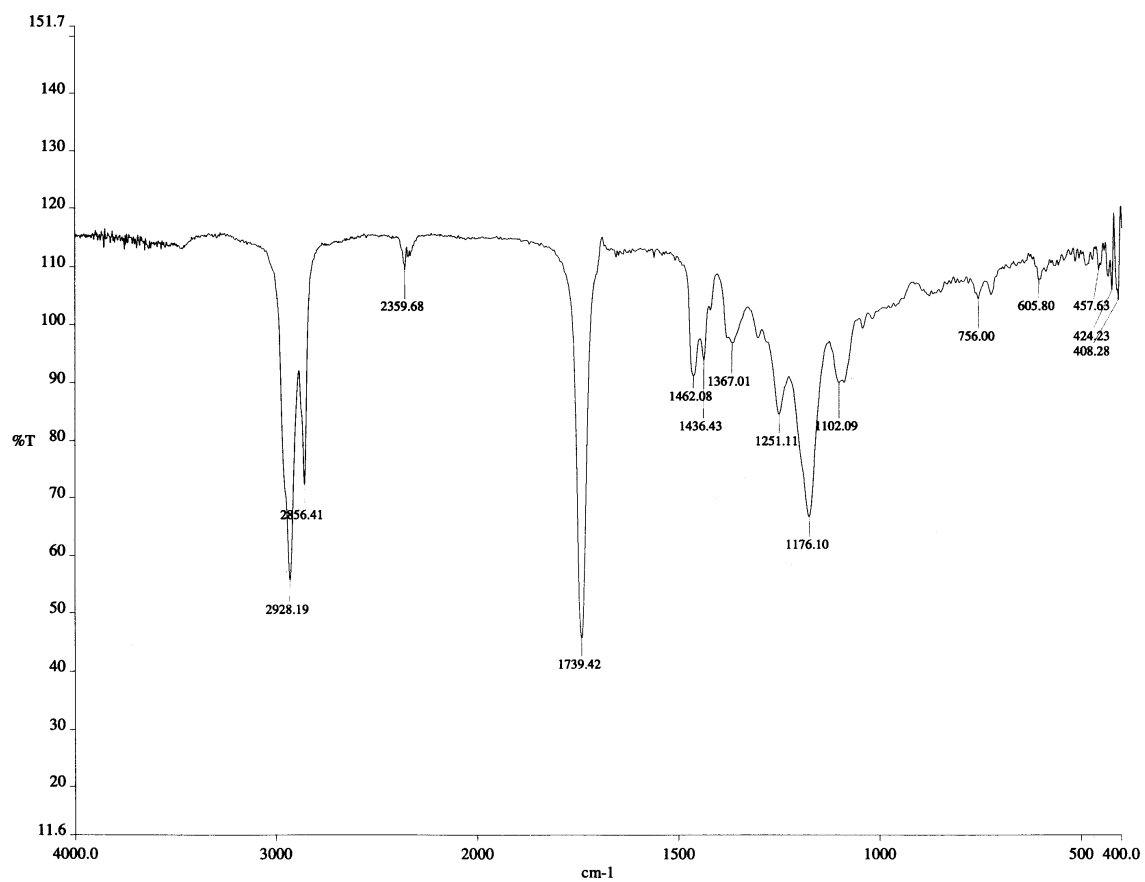

**Fig.S21. IR spectrum of Butyloxy Ester of Hydroxylated Karanja Fatty Acid Methyl Esters**

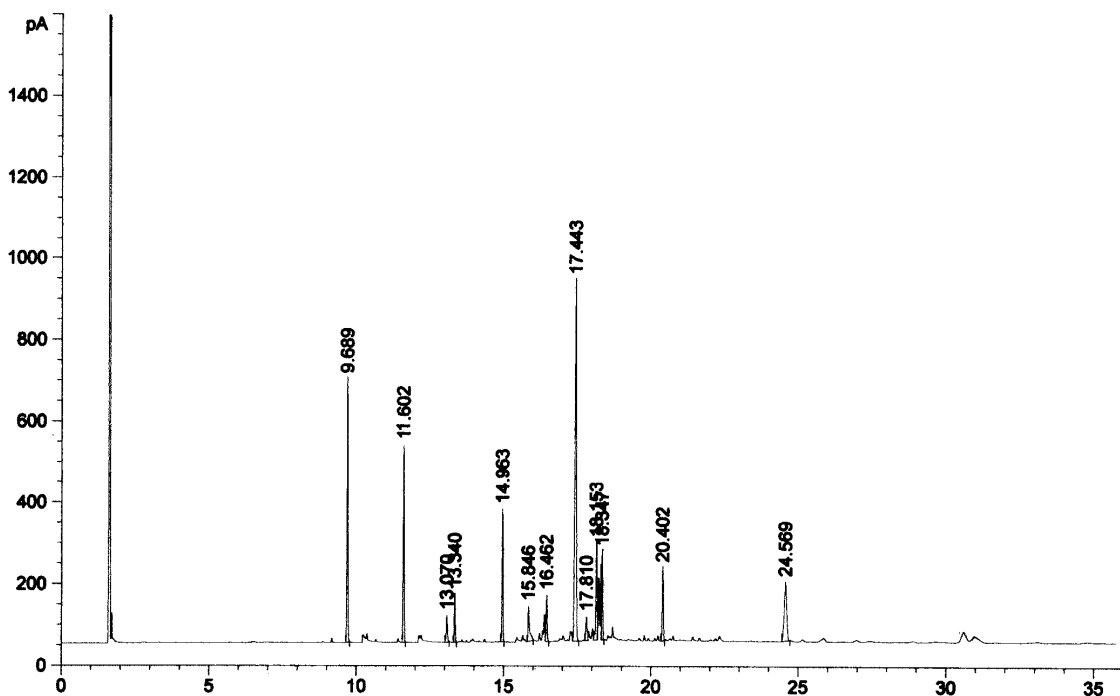

**Fig.S22. GC spectrum of Butyloxy Ester of Hydroxylated Karanja Fatty Acid Methyl Esters**

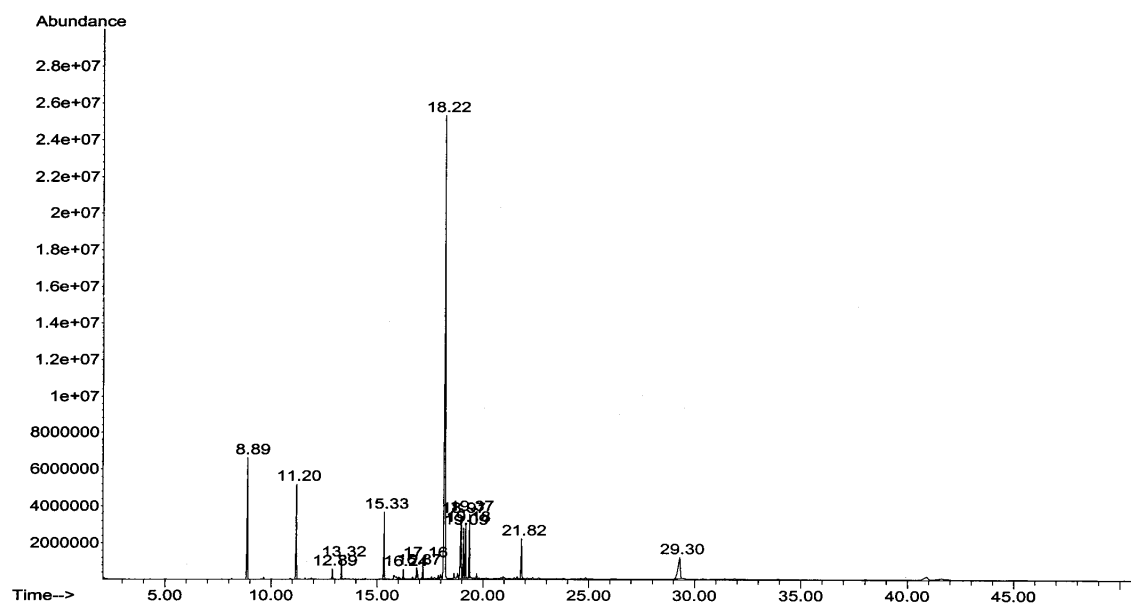

**Fig.S23. GCMS spectrum of Butyloxy Ester of Hydroxylated Karanja Fatty Acid Methyl Esters**
